# Supplementary material for: Chitin-Derived Nitrogen-Doped Carbon Nanopaper with Subwavelength Nanoporous Structures for Solar Thermal Heating
Source: MDPI journal article supplement (doi:10.3390/nano13091480), 2023-04-26
Supplement: s1 [file s1]

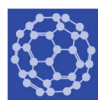

## Supplementary Materials

# Chitin-Derived Nitrogen-Doped Carbon Nanopaper with Subwavelength Nanoporous Structures for Solar Thermal Heating

Thanakorn Yeamsuksawat, Luting Zhu, Takaaki Kasuga, Masaya Nogi and Hirotaka Koga \*

SANKEN (The Institute of Scientific and Industrial Research), Osaka University, 8-1 Mihogaoka, Ibaraki, Osaka 567-0047, Japan; y.thanakorn@eco.sanken.osaka-u.ac.jp (T.Y.); sharollzhu@eco.sanken.osaka-u.ac.jp (L.Z.); tkasuga@eco.sanken.osaka-u.ac.jp (T.K.); nogi@eco.sanken.osaka-u.ac.jp (M.N.)

\* Correspondence: hkoga@eco.sanken.osaka-u.ac.jp; Tel.: +81-6-6879-8442; Fax: +81-6-6879-8444

## Supporting Figures

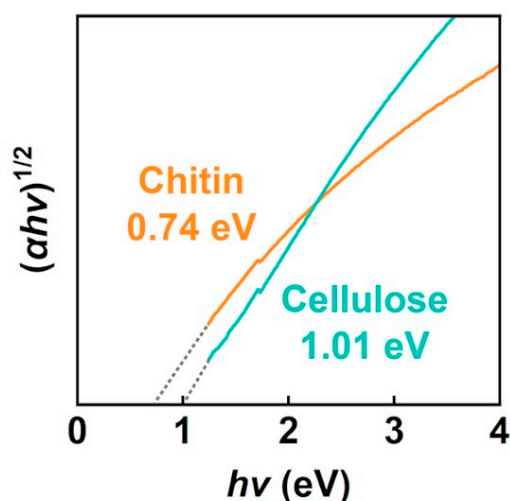

**Figure S1.** Tauc plots and estimated optical bandgap values of the carbonized chitin and cellulose nanopapers. Carbonization temperature: 400 °C.

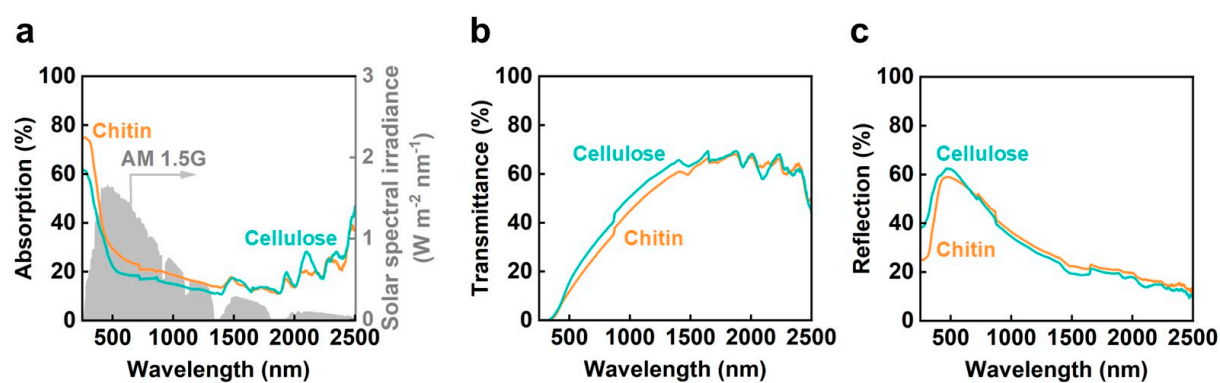

**Figure S2.** Light absorption properties of the original chitin and cellulose nanopapers before carbonization. (a) Solar spectral irradiance (AM1.5G) and UV-vis-NIR absorption, (b) transmittance, and (c) reflection spectra.

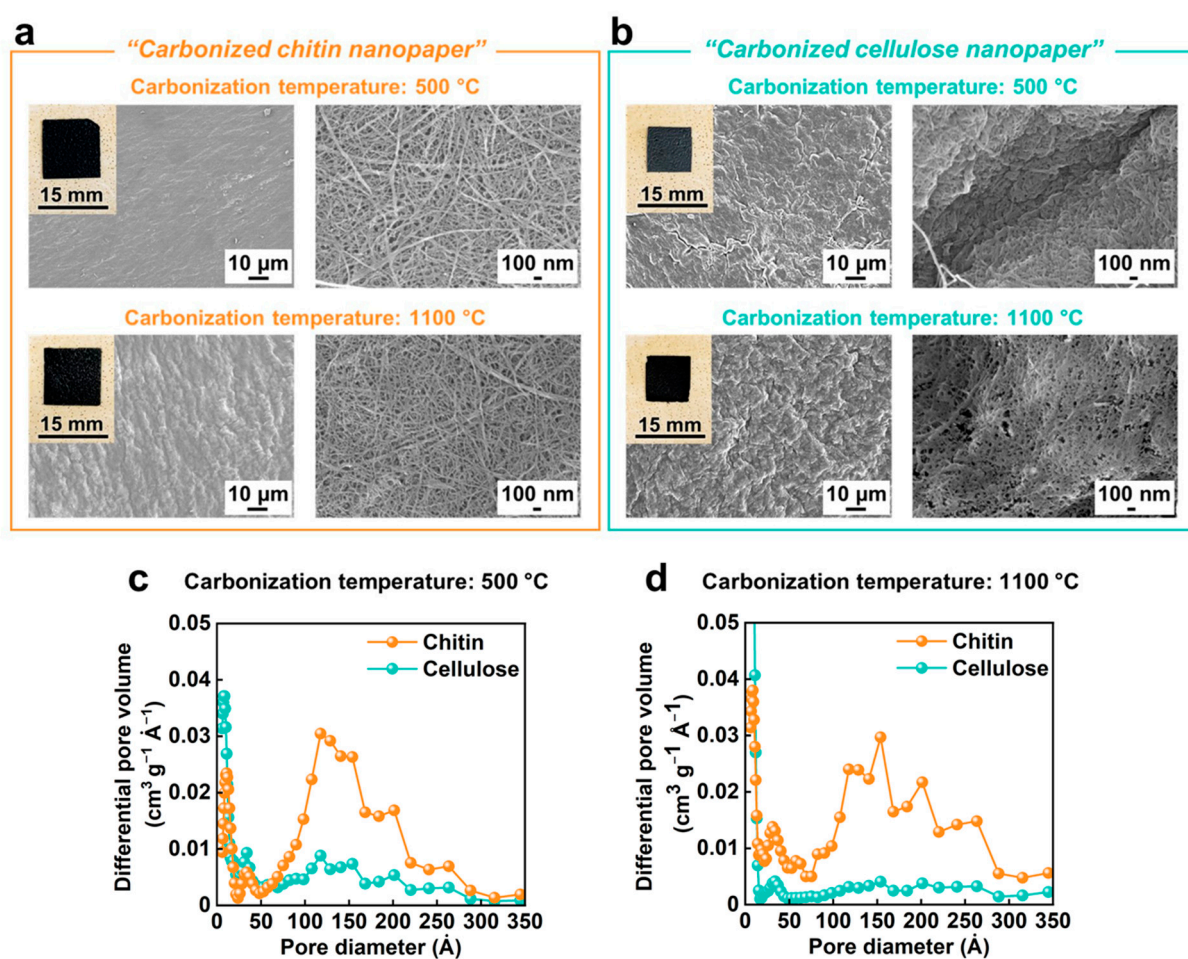

**Figure S3.** Morphologies of the carbonized chitin and cellulose nanopapers. Optical and field-emission scanning electron microscopy images of the carbonized (a) chitin and (b) cellulose nanopapers, and pore size distribution curves of the chitin and cellulose nanopapers carbonized at (c) 500 and (d) 1100 °C. Carbonization temperature: 500 or 1100 °C.

The carbonized chitin nanopaper could retain the subwavelength nanoporous structures even at 1100 °C, while microscale wrinkles were gradually formed on its surfaces with increasing carbonization temperatures.

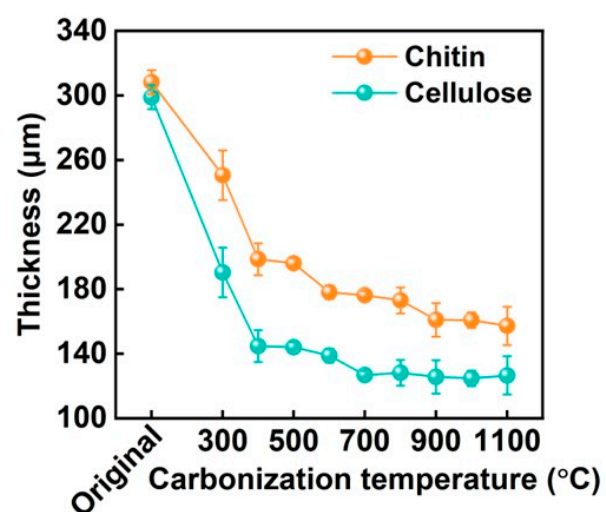

Figure S4. Thickness of the chitin and cellulose nanopapers carbonized at different temperatures.
